# Supplementary material for: The relationship between precipitation and insurance data for flooddamages in a region of the Mediterranean (Northeast Spain)
Source: Copernicus journal article supplement (doi:10.5194/nhess-2017-278), 2017-08-07
Supplement: Supplementary file [file cortes_et_al_review_supplementary.pdf › Reviewers/cortes_et_al_review_supplementary.pdf]

## **SUPPLEMENTARY MATERIAL**

### **TABLES**

**Table 1: Basin aggregation**

| ALL BASINS |                                                | BASINS               |                                                |
|------------|------------------------------------------------|----------------------|------------------------------------------------|
| CODE       | BASIN NAME                                     | JOIN                 |                                                |
| CODE       | BASIN NAME                                     | CODE                 | BASIN NAME                                     |
| 001        | Tec, el                                        | 1001 (001; 002; 030) | El Tec; Rieres litorals Muga; La Muga          |
| 002        | Rieres litorals Muga                           | 1002 (003; 040)      | Rieres litorals Fluvià; El Fluvià              |
| 003        | Rieres litorals Fluvià                         | 006                  | El Daró                                        |
| 006        | Daró, el                                       | 1003 (015; 852)      | El Gaià; Rieres Tarragona Centre               |
| 015        | Gaià, el                                       | 019                  | Riera de Riudecanyes                           |
| 019        | Riera de Riudecanyes                           | 1004 (025; 970)      | La Sénia; Rieres litorals Ebre Sud             |
| 025        | Sénia, la                                      | 050                  | Tordera, la                                    |
| 030        | Muga, la                                       | 060                  | Besòs, el                                      |
| 040        | Fluvià, el                                     | 070                  | Foix, el                                       |
| 050        | Tordera, la                                    | 080                  | Frankolí, el                                   |
| 060        | Besòs, el                                      | 090                  | Garona, eth                                    |
| 070        | Foix, el                                       | 100                  | Ter, el                                        |
| 080        | Frankolí, el                                   | 200                  | Llobregat, el                                  |
| 090        | Garona, eth                                    | 300                  | Segre, el                                      |
| 100        | Ter, el                                        | 400                  | Ebre, l'                                       |
| 200        | Llobregat, el                                  | 500                  | Rieres Costa Brava Nord                        |
| 300        | Segre, el                                      | 600                  | Rieres Costa Brava Centre                      |
| 400        | Ebre, l'                                       | 618                  | Rieres Costa Brava Sud                         |
| 500        | Rieres Costa Brava Nord                        | 700                  | Rieres del Maresme                             |
| 600        | Rieres Costa Brava Centre                      | 774                  | Torrents de l' Àrea Metropolitana de Barcelona |
| 618        | Rieres Costa Brava Sud                         | 789                  | Rieres litorals Llobregat                      |
| 700        | Rieres del Maresme                             | 800                  | Rieres del Garraf                              |
| 774        | Torrents de l' Àrea Metropolitana de Barcelona | 833                  | Rieres Tarragona Nord                          |
| 789        | Rieres litorals Llobregat                      | 900                  | Rieres Tarragona Sud                           |
| 800        | Rieres del Garraf                              | 913                  | Rieres Meridionals de Tarragona                |
| 833        | Rieres Tarragona Nord                          | 944                  | Rieres litorals Ebre Nord                      |
| 852        | Rieres Tarragona Centre                        | 970                  | Rieres litorals Ebre Sud                       |
| 900        | Rieres Tarragona Sud                           |                      |                                                |
| 913        | Rieres Meridionals de Tarragona                |                      |                                                |
| 944        | Rieres litorals Ebre Nord                      |                      |                                                |
| 970        | Rieres litorals Ebre Sud                       |                      |                                                |

**Table 2: Warning zones aggregation**

| ALL WARNING ZONE |                                | WARNING ZONE            |                                                     |
|------------------|--------------------------------|-------------------------|-----------------------------------------------------|
| CODE             | WARNING ZONE NAME              | CODE                    | WARNING ZONE NAME                                   |
| 694304           | Litoral sur de Tarragona       | 694304                  | Litoral sur de Tarragona                            |
| 694302           | Cadena prelitoral de Tarragona | 694302                  | Cadena prelitoral de Tarragona                      |
| 694301           | Depresión central de Tarragona | 694301                  | Depresión central de Tarragona                      |
| 694303           | Litoral norte de Tarragona     | 694303                  | Litoral norte de Tarragona                          |
| 690804           | Prelitoral de Barcelona        | 690804                  | Prelitoral de Barcelona                             |
| 692503           | Depresión central de Lleida    | 692503                  | Depresión central de Lleida                         |
| 690803           | Prelitoral de Barcelona        | 690803                  | Prelitoral de Barcelona                             |
| 690802           | Depresión central de Barcelona | 690802                  | Depresión central de Barcelona                      |
| 691704           | Litoral sur de Girona          | 691704                  | Litoral sur de Girona                               |
| 691702           | Prelitoral de Girona           | 691702                  | Prelitoral de Girona                                |
| 691703           | Empordà                        | 691703                  | Empordà                                             |
| 690801           | Prepirineo de Barcelona        | 690000 (690801; 691701) | Prepirineo de Barcelona, pirineo de Lleida y Llivia |
| 692502           | Pirineo de Lleida              | 692502                  | Pirineo de Lleida                                   |
| 691701           | Pirineo de Girona y Llivia     | 692501                  | Valle de Arán                                       |
| 692501           | Valle de Arán                  |                         |                                                     |

**Table 3: Parameters of the logistic model and RA values for the basin level with 40 mm/24 h precipitation threshold. Number of flood cases: 331.\* Indicates no significance (p-value>0.05).**

| PERCENTILE | DAMAGE | $\beta_0$ | $\beta_1$ | RA   |
|------------|--------|-----------|-----------|------|
| 50         | D      | -3.62     | 0.83      | 0.60 |
|            | DPC    | -6.83     | 1.56      | 0.67 |
|            | DPW    | -7.16     | 1.63      | 0.68 |
| 60         | D      | -5.11     | 1.06      | 0.63 |
|            | DPC    | -7.79     | 1.67      | 0.69 |
|            | DPW    | -8.68     | 1.87      | 0.71 |
| 70         | D      | -6.06     | 1.17      | 0.65 |
|            | DPC    | -9.05     | 1.84      | 0.71 |
|            | DPW    | -8.88     | 1.80      | 0.71 |
| 80         | D      | -9.19     | 1.73      | 0.72 |
|            | DPC    | -10.73    | 2.07      | 0.74 |
|            | DPW    | -9.74     | 1.85      | 0.73 |
| 90         | D      | -10.47    | 1.82      | 0.74 |
|            | DPC    | -11.48    | 2.03      | 0.74 |
|            | DPW    | -13.76    | 2.52      | 0.80 |

**Table 4: Parameters of the logistic model and RA values for the warning zone level with 40 mm/24 h precipitation threshold. Number of flood cases: 243.**

| PERCENTILE | DAMAGE | $\beta_0$ | $\beta_1$ | RA   |
|------------|--------|-----------|-----------|------|
| 50         | D      | -2.73     | 0.62      | 0.6  |
|            | DPC    | -6.79     | 1.53      | 0.7  |
|            | DPW    | -6.81     | 1.54      | 0.7  |
| 60         | D      | -4.05     | 0.82      | 0.63 |
|            | DPC    | -7.54     | 1.59      | 0.71 |
|            | DPW    | -7.21     | 1.52      | 0.71 |
| 70         | D      | -4.82     | 0.89      | 0.63 |
|            | DPC    | -8.25     | 1.64      | 0.73 |
|            | DPW    | -9        | 1.8       | 0.74 |
| 80         | D      | -7.35     | 1.31      | 0.7  |
|            | DPC    | -9.67     | 1.81      | 0.76 |
|            | DPW    | -10.65    | 2.03      | 0.78 |
| 90         | D      | -8.92     | 1.46      | 0.73 |
|            | DPC    | -11.04    | 1.9       | 0.79 |
|            | DPW    | -11.62    | 2.02      | 0.81 |

**Table 5: Parameters of the logistic model and RA values for the warning zone level with 60 mm/24 h precipitation threshold. Number of flood cases: 180.\* Indicates no significance (p-value>0.05).**

| PERCENTILE | DAMAGE | $\beta_0$ | $\beta_1$ | RA    |
|------------|--------|-----------|-----------|-------|
| 50         | D      | -2.13*    | 0.46*     | 0.58* |
|            | DPC    | -6.54     | 1.41      | 0.66  |
|            | DPW    | -6.52     | 1.41      | 0.67  |
| 60         | D      | -2.08*    | 0.36*     | 0.55* |
|            | DPC    | -7.07     | 1.43      | 0.68  |
|            | DPW    | -6.94     | 1.4       | 0.67  |
| 70         | D      | -3.64*    | 0.6*      | 0.58* |
|            | DPC    | -8.06     | 1.54      | 0.7   |
|            | DPW    | -10.04    | 1.96      | 0.75  |
| 80         | D      | -3.9*     | 0.54*     | 0.56* |
|            | DPC    | -10.04    | 1.83      | 0.75  |
|            | DPW    | -10.01    | 1.82      | 0.74  |
| 90         | D      | -8.44     | 1.32      | 0.71  |
|            | DPC    | -10.61    | 1.76      | 0.75  |
|            | DPW    | -10.57    | 1.75      | 0.75  |

**Table 6: Parameters of the logistic model and RA values for the MAB level with 20 mm/30 min precipitation threshold. Number of flood cases: 21. \* Indicates no significance (p-value>0.05).**

| PERCENTILE | DAMAGE | $\beta_0$ | $\beta_1$ | RA   |
|------------|--------|-----------|-----------|------|
| 50         | D      | -42.27    | 12.28     | 0.94 |
|            | DPC    | -42.27    | 12.28     | 0.94 |
|            | DPW    | -34.04    | 9.81      | 0.91 |
| 60         | D      | -75.09    | 11.66     | 0.95 |
|            | DPC    | -26.47    | 11.66     | 0.95 |
|            | DPW    | -33.68    | 11.66     | 0.95 |
| 70         | D      | -27.89    | 7.23      | 0.92 |
|            | DPC    | -27.89    | 7.23      | 0.92 |
|            | DPW    | -27.89    | 7.23      | 0.92 |
| 80         | D      | -16.25    | 4.05*     | 0.82 |
|            | DPC    | -16.25    | 4.05*     | 0.82 |
|            | DPW    | -16.25    | 4.05*     | 0.82 |
| 90         | D      | -6759.73  | 1727.74*  | 1 *  |
|            | DPC    | -6759.73  | 1727.74*  | 1 *  |
|            | DPW    | -6759.73  | 1727.74*  | 1 *  |

**Table 7: Damage percentiles for all the damage indicators, precipitation indicators and levels. Damage (D) is in euros, damage per capita (DPC) in euros/population and damage per wealth (DPW) in euros/GDP.**

| PERCENTILE | DAMAGE | BASINS     |            | WARNING ZONES |            | MAB          |              |
|------------|--------|------------|------------|---------------|------------|--------------|--------------|
|            |        | 40 mm/24 h | 60 mm/24 h | 40 mm/24 h    | 60 mm/24 h | 10 mm/30 min | 20 mm/30 min |
| 50         | D      | 76534      | 91732      | 180148        | 228677     | 191222       | 332437       |
|            | DPC    | 0.40       | 0.48       | 0.33          | 0.54       | 0.06         | 0.11         |
|            | DPW    | 20         | 27         | 15            | 26         | 2            | 4            |
| 60         | D      | 142642     | 177573     | 288708        | 342690     | 253197       | 439954       |
|            | DPC    | 0.66       | 0.96       | 0.61          | 0.82       | 0.09         | 0.14         |
|            | DPW    | 36         | 57         | 31            | 48         | 3            | 5            |
| 70         | D      | 244098     | 280868     | 465357        | 601829     | 446198       | 1754684      |
|            | DPC    | 1.25       | 1.97       | 1.12          | 1.60       | 0.14         | 0.56         |
|            | DPW    | 71         | 97         | 60            | 94         | 5            | 19           |
| 80         | D      | 512063     | 798412     | 800506        | 1203333    | 1394559      | 2992793      |
|            | DPC    | 3.15       | 4.14       | 2.38          | 2.76       | 0.45         | 0.93         |
|            | DPW    | 141        | 200        | 132           | 164        | 13           | 29           |
| 90         | D      | 1670401    | 2377659    | 2504096       | 3191660    | 3414333      | 10680483     |
|            | DPC    | 7.97       | 13.15      | 5.28          | 6.35       | 1.07         | 3.57         |
|            | DPW    | 380        | 591        | 301           | 417        | 35           | 103          |

**FIGURES**

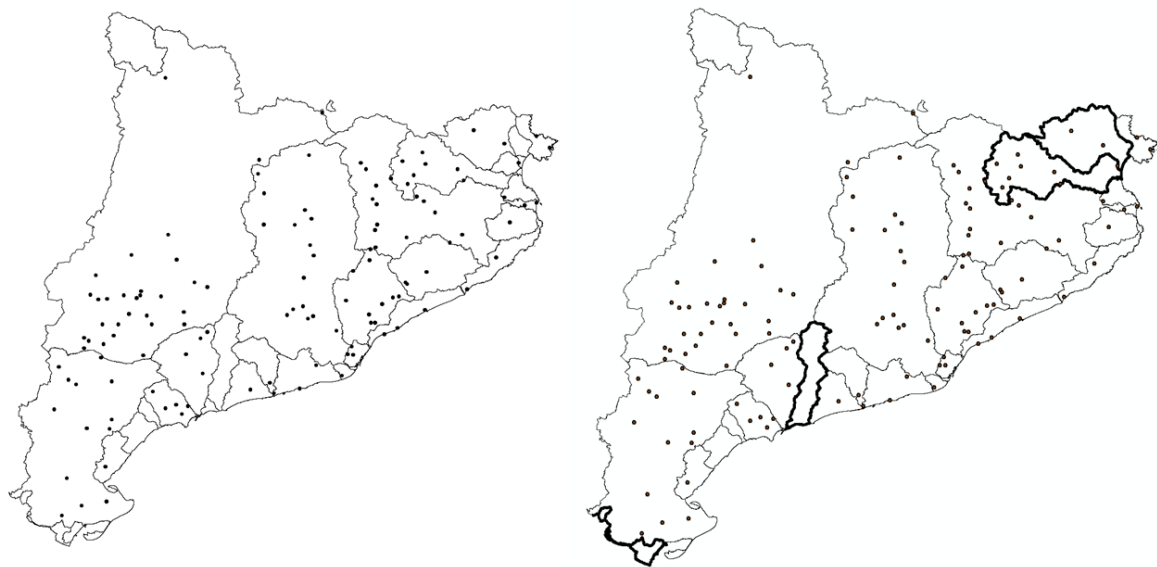

**Figure 1. Basins aggregation**

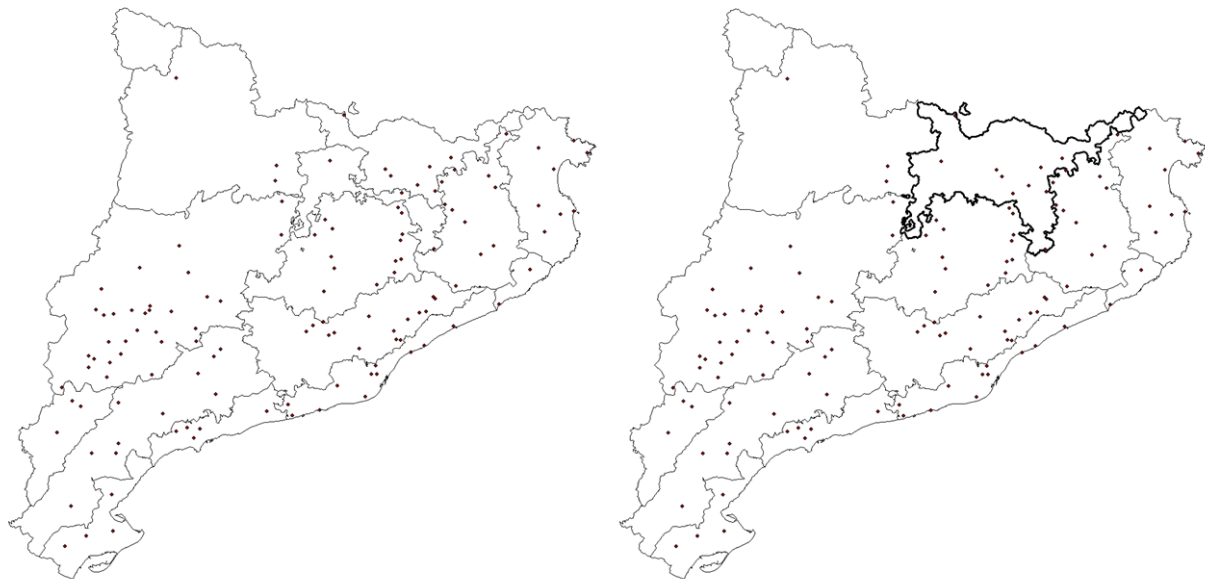

**Figure 2. Warning zones aggregation**

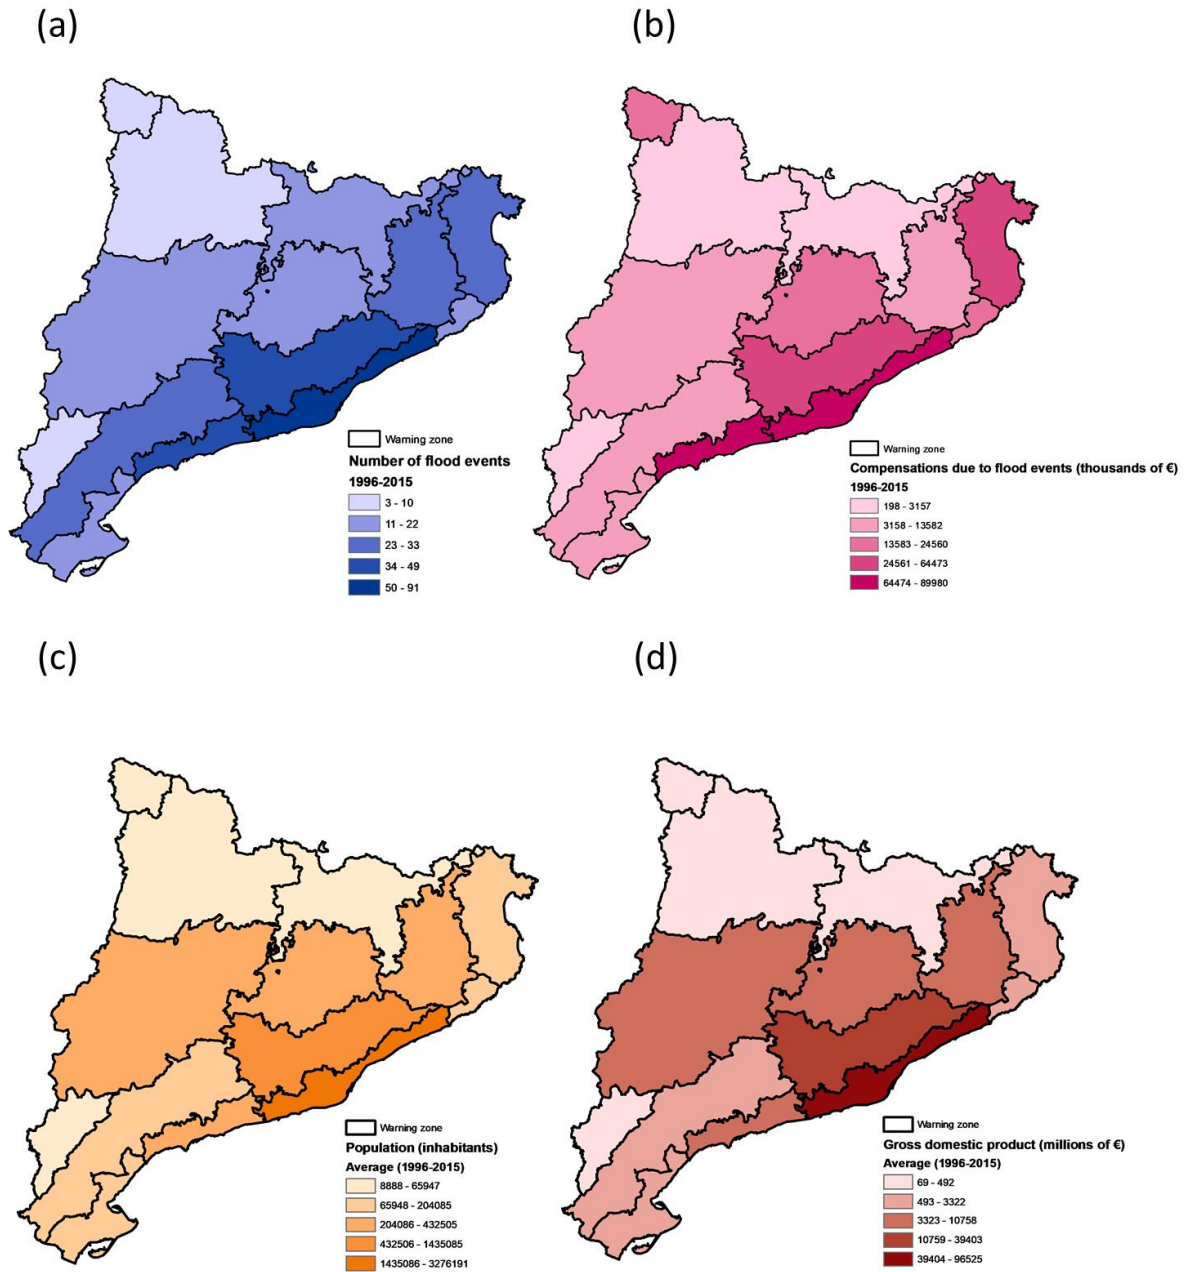

**Figure 3. (a) Warning zone distribution of flood events (1996-2015); (b) total insurance compensations for floods made by CCS (1996-2015); (c) average total population; and (d) average gross domestic product.**

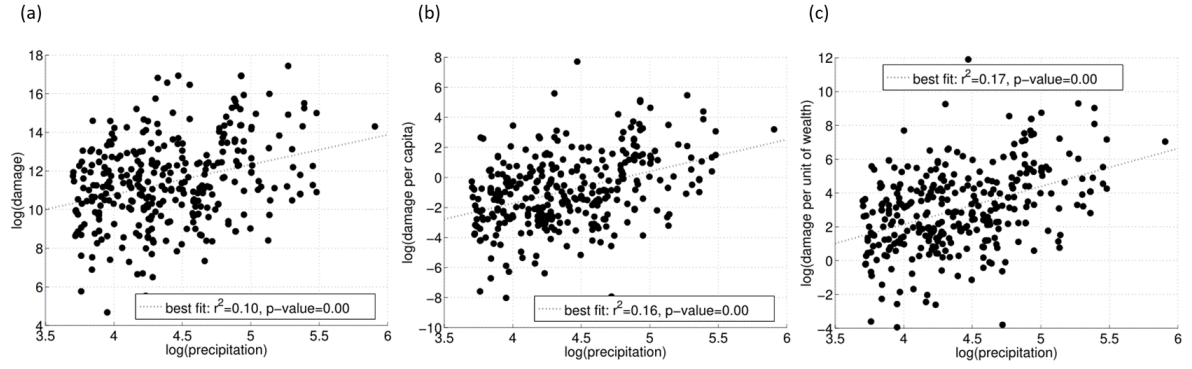

**Figure 4:** Scatter plot between basin-aggregated maximum precipitation in 24 h and (a) total damages (D); (b) damage per capita (DPC); and (c) damage per unit of wealth (DPW), for flood events recorded in Catalonia between 1996 and 2015 (log-transformed values). The dashed line indicates the fit based on a linear regression model. ( $P_0=40$  mm/24 h).

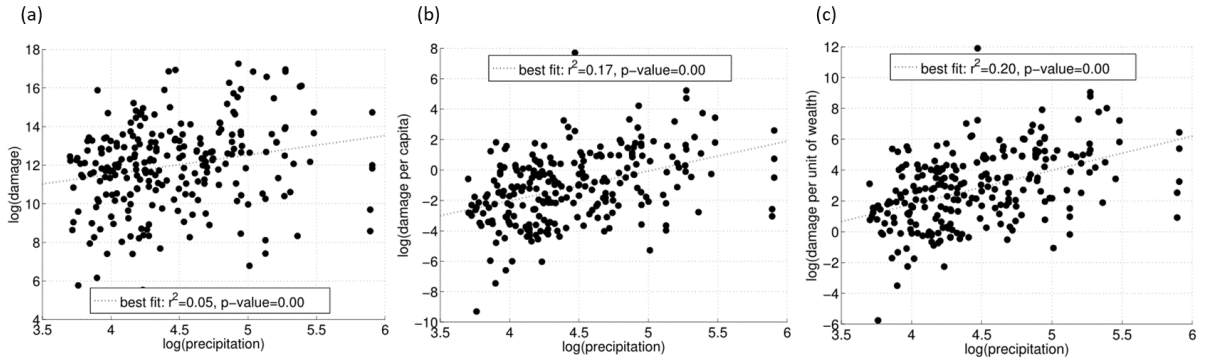

**Figure 5:** Scatter plot between warning zone-aggregated maximum precipitation in 24 h and (a) total damages (D); (b) damage per capita (DPC); and (c) damage per unit of wealth (DPW), for flood events recorded in Catalonia between 1996 and 2015 (log-transformed values). The dashed line indicates the fit based on a linear regression model. ( $P_0=40$  mm/24 h).

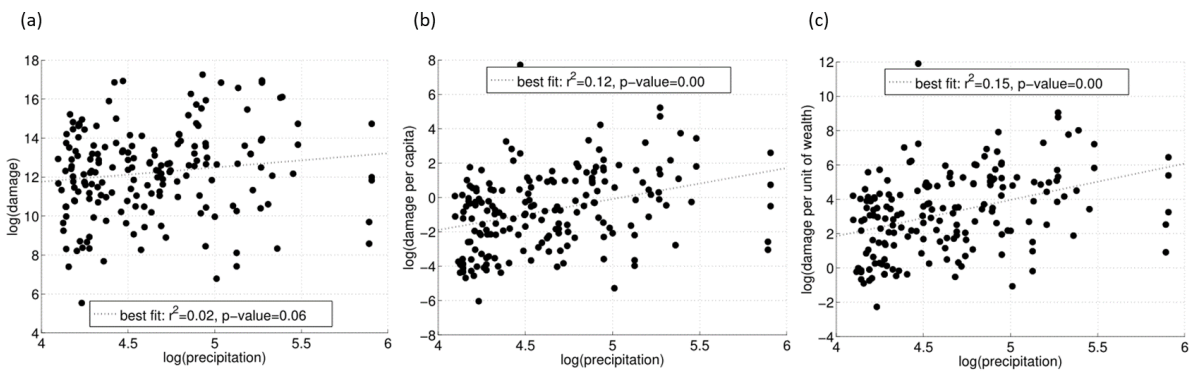

**Figure 6:** Scatter plot between warning zone-aggregated maximum precipitation in 24 h and (a) total damages (D); (b) damage per capita (DPC); and (c) damage per unit of wealth (DPW), for flood events recorded in Catalonia between 1996 and 2015 (log-transformed values). The dashed line indicates the fit based on a linear regression model. ( $P_0=60$  mm/24 h).

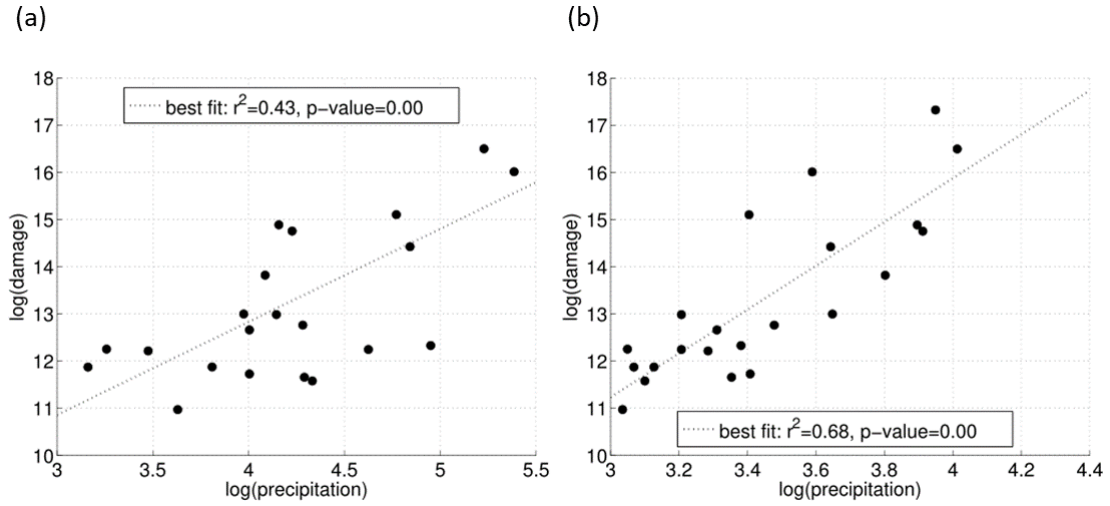

Figure 7: scatter plot (a) damages (D) versus 24 h precipitation ( $P_0=20$  mm/24 h) and (b) damages (D) versus 30 minute precipitation ( $P_0=20$  mm/30 min) for the MAB.

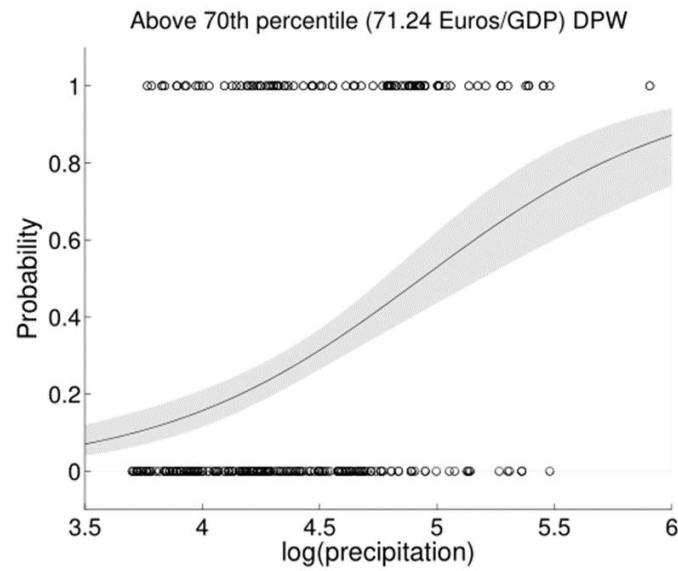

Figure 8: Example of logistic regression result to model DPW damages above the 70th percentile as a function of precipitation (log-transformed) for basin level. The solid line indicates the best estimate while the shaded band indicates the 95% confidence interval. Open circles along the horizontal axis show the events that are above (top) and below (bottom) the 70th percentile. ( $P_0=40$  mm/24 h).



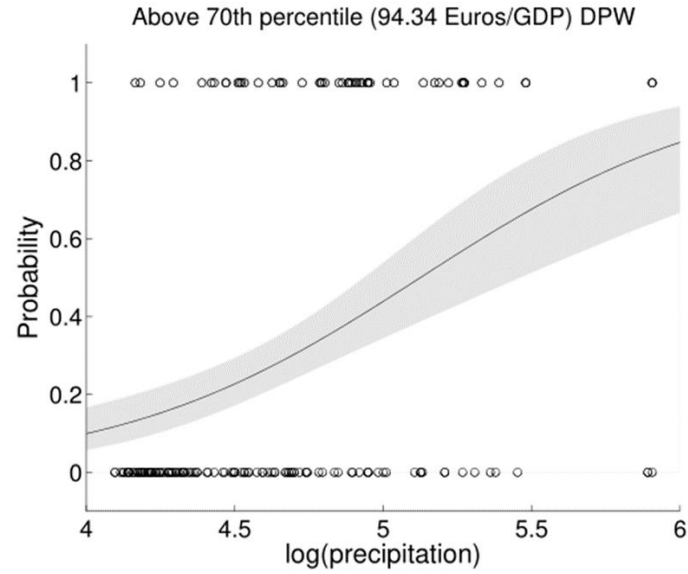

Figure 9: Example of logistic regression result to model DPW damages above the 70th percentile as a function of precipitation (log-transformed) for warning zone level. The solid line indicates the best estimate while the shaded band indicates the 95% confidence interval. Open circles along the horizontal axis show the events that are above (top) and below (bottom) the 70th percentile. ( $P_0=60$  mm/24 h).

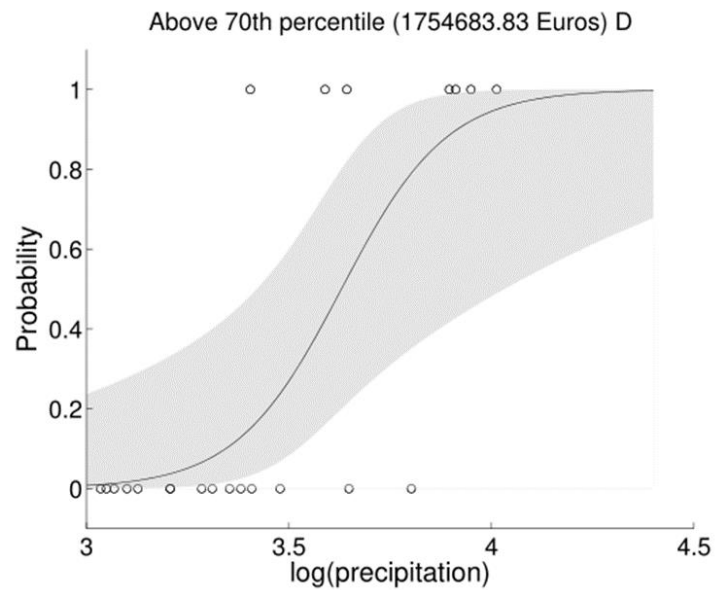

Figure 10: Example of logistic regression result to model D damages above the 70th percentile as a function of precipitation (log-transformed) for the MAB. The solid line indicates the best estimate while the shaded band indicates the 95% confidence interval. Open circles along the horizontal axis show the events that are above (top) and below (bottom) the 70th percentile. ( $P_0=20$  mm/30 min).

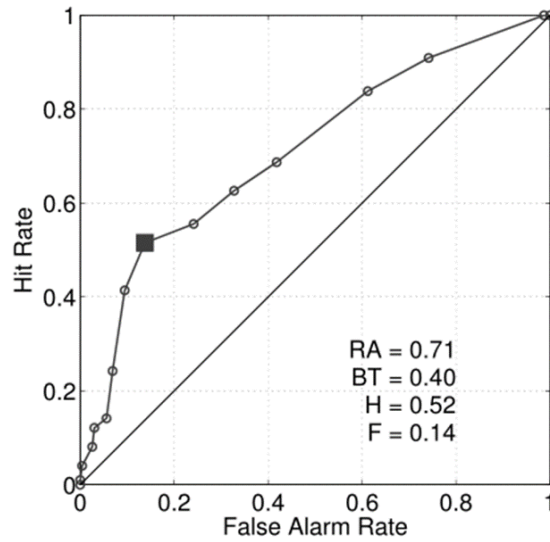

Figure 11: Relative operating characteristic (ROC) diagram for above 70th DPW predictions for basin level using the logistic regression of Eq. (1) ( $P_0=40$  mm/24 h). The open dots indicate a set of probability forecasts by stepping a decision threshold with 5% probability through the modelling results. The numbers inside the plots are the ROC Area (RA) and the Best Threshold (BT), here defined as the threshold that maximise the difference between the hit rate (H) and the false alarm rate (F).

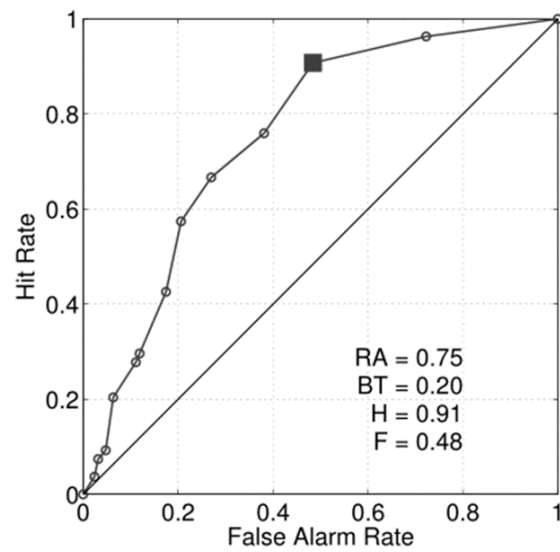

Figure 12: Relative operating characteristic (ROC) diagram for above 70th DPW predictions for the warning zones using the logistic regression of Eq. (1) ( $P_0=60$  mm/24 h). The open dots indicate a set of probability forecasts by stepping a decision threshold with 5% probability through the modelling results. The numbers inside the plots are the ROC Area (RA) and the Best Threshold (BT), here defined as the threshold that maximise the difference between the hit rate (H) and the false alarm rate (F).

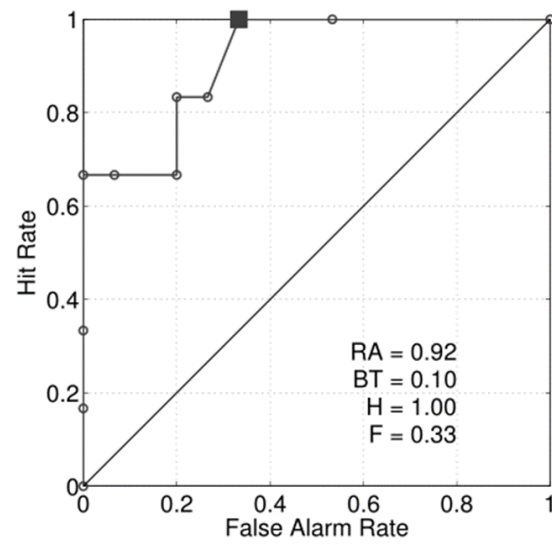

**Figure 13: Relative operating characteristic (ROC) diagram for above 70th D predictions for the MAB using the logistic regression of Eq. (1) ( $P_0=20$  mm/30 min). The open dots indicate a set of probability forecasts by stepping a decision threshold with 5% probability through the modelling results. The numbers inside the plots are the ROC Area (RA) and the Best Threshold (BT), here defined as the threshold that maximise the difference between the hit rate (H) and the false alarm rate (F).**
